# Supplementary material
Source: publisher figshare collection journal article supplement (https://tandf.figshare.com/ndownloader/files/12272702)
Supplement: Supplementary file 1 [file 12272702]

**Supplemental Online Material**

UK Weather maps for the six standard construction activities (Standard resolution) (23 MB):

<http://bit.ly/2yAMMyT>

Excel spreadsheet with summary of all regression calculations (Sine wave fits & more) (41 MB):

<http://bit.ly/2jXnwhP>

Programmable spreadsheet for calculating stochastic and deterministic weather-aware Project Durations (from weather-unaware schedules) (29 MB)

<http://bit.ly/2jaaFf5>

Programmable spreadsheet for dealing with weather-related claims (forensic weather analysis) (34 MB)

<http://bit.ly/2nGQB5r>

These spreadsheets have lots of data to load before start working (once saved they are relatively quick at processing the user’s input data). Please be patient, particularly when opening them.
